# Supplementary material for: Inorganic CsBi3I10 perovskite/silicon heterojunctions for sensitive, self-driven and air-stable NIR photodetectors
Source: Royal Society of Chemistry journal article supplement (doi:10.1039/c8tc05765f), 2018-12-11
Supplement: c8tc05765f1.pdf [file c8tc05765f1.pdf]

Supporting Information for

## Inorganic CsBi<sub>3</sub>I<sub>10</sub> Perovskite/Silicon Heterojunctions for Sensitive, Self-driven and Air-Stable NIR Photodetectors

Xiao-Wei Tong,<sup>1</sup> Zhi-Xiang Zhang,<sup>1</sup> Di Wang,<sup>1</sup> Lin-Bao Luo,<sup>1\*</sup> Chao Xie,<sup>1\*</sup> Yu-Cheng Wu<sup>2\*</sup>

<sup>1</sup> School of Electronic Sciences and Applied Physics, Hefei University of Technology, Hefei, Anhui 230009, China. \*E-mail: luob@hfut.edu.cn, chao.xie@hfut.edu.cn

<sup>2</sup> School of Materials Science and Engineering and Anhui Provincial Key Laboratory of Advanced Functional Materials and Devices, Hefei University of Technology, Hefei Anhui 230009, China. \*E-mail: ycwu@hfut.edu.cn

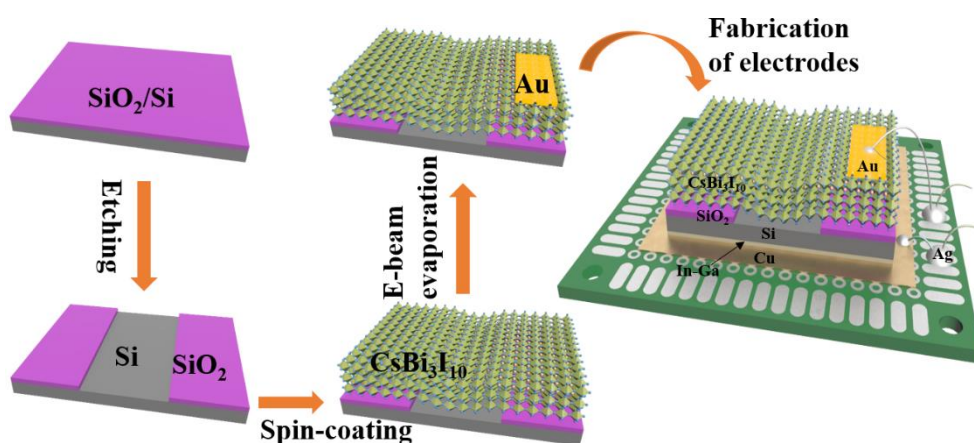

**Figure S1.** Schematic illustration of fabrication procedure of the CsBi<sub>3</sub>I<sub>10</sub> perovskite/Si heterojunction photodetector.

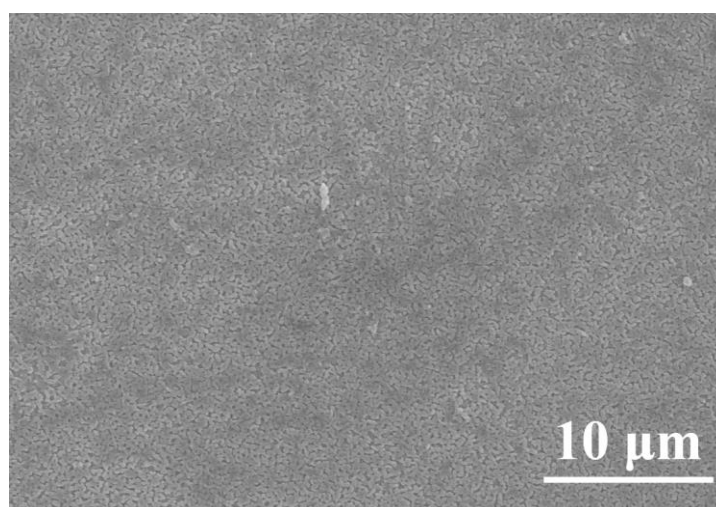

**Figure S2** A top-view SEM image of CsBi<sub>3</sub>I<sub>10</sub> film.

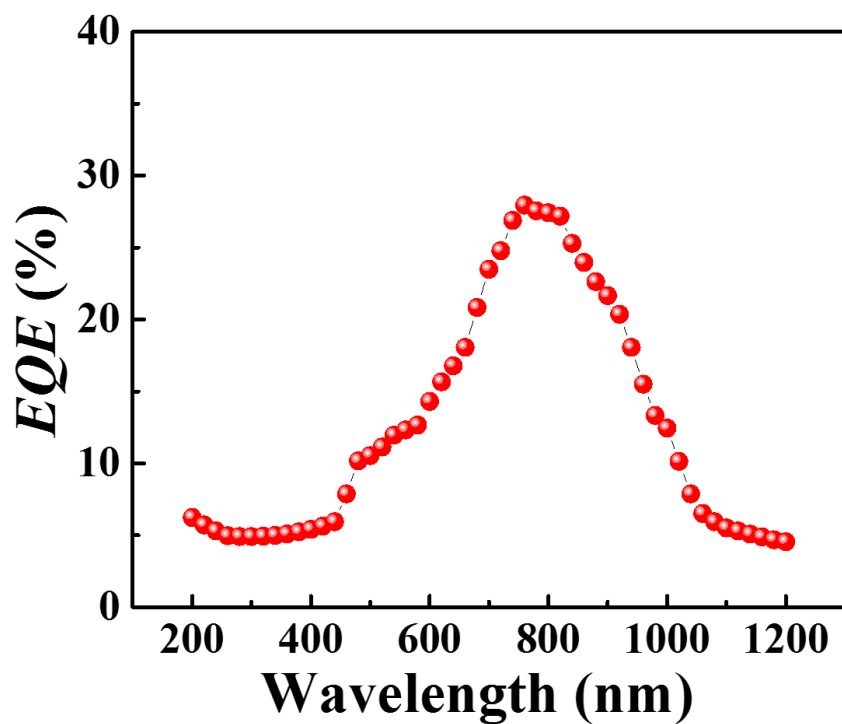

**Figure S3**  $EQE$  of  $CsBi_3I_{10}$  perovskite/Si heterojunction photodetector with different wavelength.

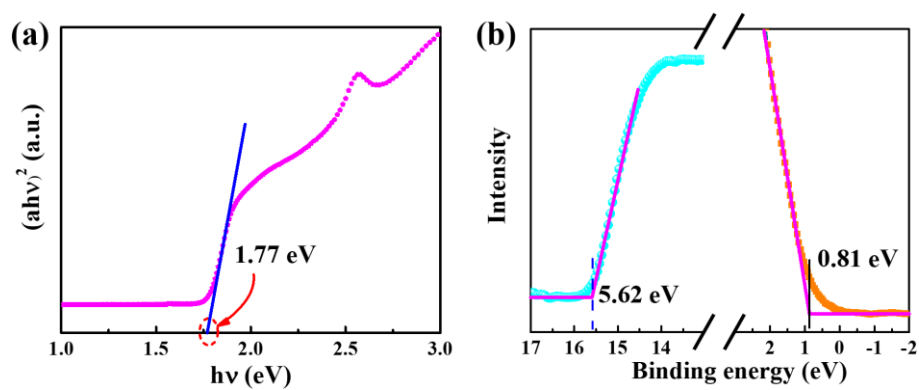

**Figure S4** (a) The dependence of  $(ah\nu)^2$  on  $h\nu$  for the  $CsBi_3I_{10}$  perovskite, from which the band gap of  $\sim 1.77$  eV was deduced. (b) UPS spectrum of the  $CsBi_3I_{10}$  perovskite film.

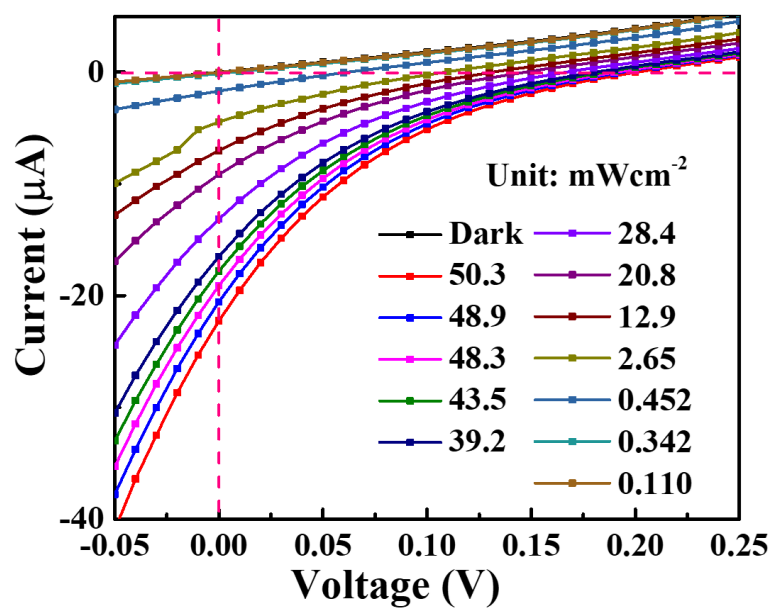

**Figure S5**  $I$ - $V$  characteristics of  $\text{CsBi}_3\text{I}_{10}$  perovskite/Si heterojunction photodetector in dark and under 808 nm light illumination with varied light intensities.

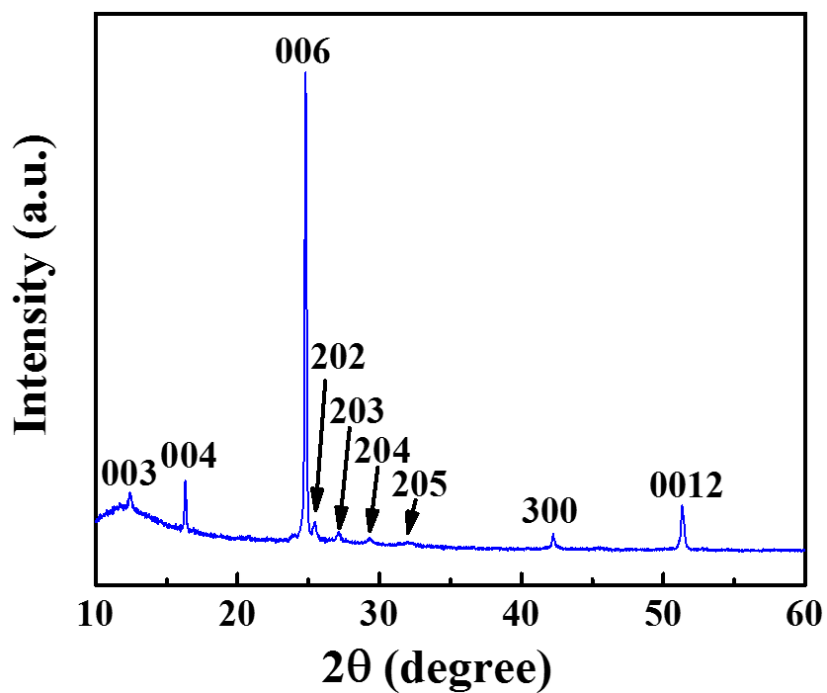

**Figure S6** XRD pattern of the  $\text{CsBi}_3\text{I}_{10}$  perovskite film after 3 months storage.
